# Supplementary material for: Pax6 organizes the anterior eye segment by guiding two distinct neural crest waves
Source: PubMed Central journal article supplement (PMC7323998; doi:10.1371/journal.pgen.1008774), 2020-06-17

S13 Figure

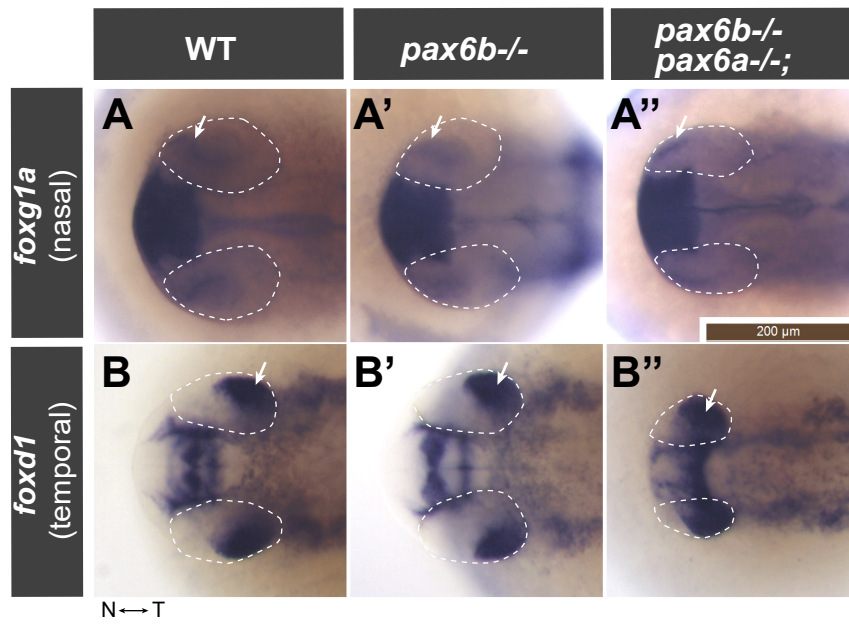

Supplement: pgen.1008774.s023.pdf [file pgen.1008774.s023.pdf]
