# Supplementary material for: Pax6 organizes the anterior eye segment by guiding two distinct neural crest waves
Source: PubMed Central journal article supplement (PMC7323998; doi:10.1371/journal.pgen.1008774), 2020-06-17

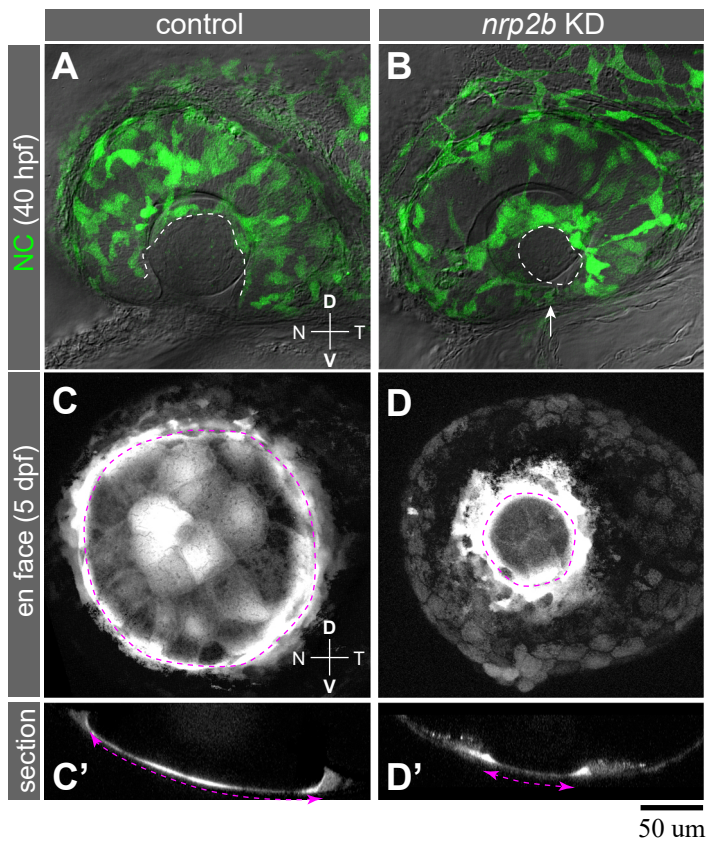

A: n=14 embryos  
 B: n=17 embryos  
 C: n= 22 embryos  
 D: n= 28 embryos

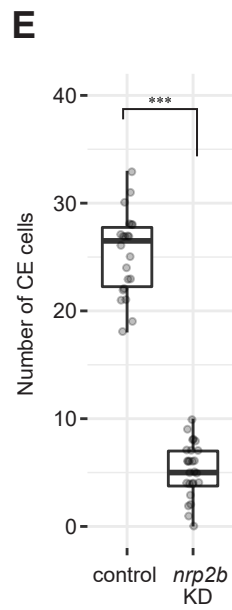

Supplement: pgen.1008774.s024.pdf [file pgen.1008774.s024.pdf]
